# Supplementary material for: Gut microbiota and physiologic bowel 18F-FDG uptake
Source: PubMed Central journal article supplement (PMC5578947; doi:10.1186/s13550-017-0318-8), 2017-08-31
Supplement: 13550_2017_318_MOESM1_ESM.pdf [file 13550_2017_318_MOESM1_ESM.pdf]

## Supplementary Information

### Gut microbiota and physiologic bowel $^{18}\text{F}$ -FDG uptake

Ji Yeon Kang<sup>1§</sup>, Han-Na Kim<sup>2§</sup>, Yoosoo Chang<sup>3</sup>, Yeojun Yun<sup>2</sup>, Seungho Ryu<sup>3</sup>, Hocheol Shin<sup>4\*</sup>, and Hyung-Lae Kim<sup>2\*</sup>

<sup>1</sup> *Department of Nuclear Medicine, Kangbuk Samsung Hospital, Sungkyunkwan University School of Medicine, Seoul, Korea*

<sup>2</sup> *Department of Biochemistry, Ewha Womans University, School of Medicine, Seoul, Korea*

<sup>3</sup> *Department of Occupational and Environmental Medicine, Kangbuk Samsung Hospital, Sungkyunkwan University School of Medicine, Seoul, Korea*

<sup>4</sup> *Department of Family Medicine, Kangbuk Samsung Hospital, Sungkyunkwan University School of Medicine, Seoul, Korea*

§ These authors contributed equally to this work, and both should be considered as first author.

**Corresponding authors:** Hyung-Lae Kim, MD, PhD and Hocheol Shin, MD, PhD.

Address: (Hyung-Lae Kim) 1071, Anyangcheon-ro, Yangcheon-gu, 07985, Seoul, South Korea, Telephone: +82-2-2650-5727, E-mail: hyung@ewha.ac.kr; (Hocheol Shin) 29, Saemunan-ro, Jongnogu, 03181, Seoul, South Korea, Telephone: +82-2-2001-2012, E-mail: hcfm.shin@samsung.com

\* These authors contributed equally to this work, and both should be considered as corresponding author.

**Fig. S1. Comparisons of community alpha diversities among groups for the intestinal  $^{18}\text{F}$ -FDG.** Alpha diversity was measured by Chao1, ACE, Shannon, and InvSimpson indices between groups. There was no significant difference in  $^{18}\text{F}$ -FDG uptake in all indices of alpha diversity between groups. The detailed summary statistics are shown in Tables S1.

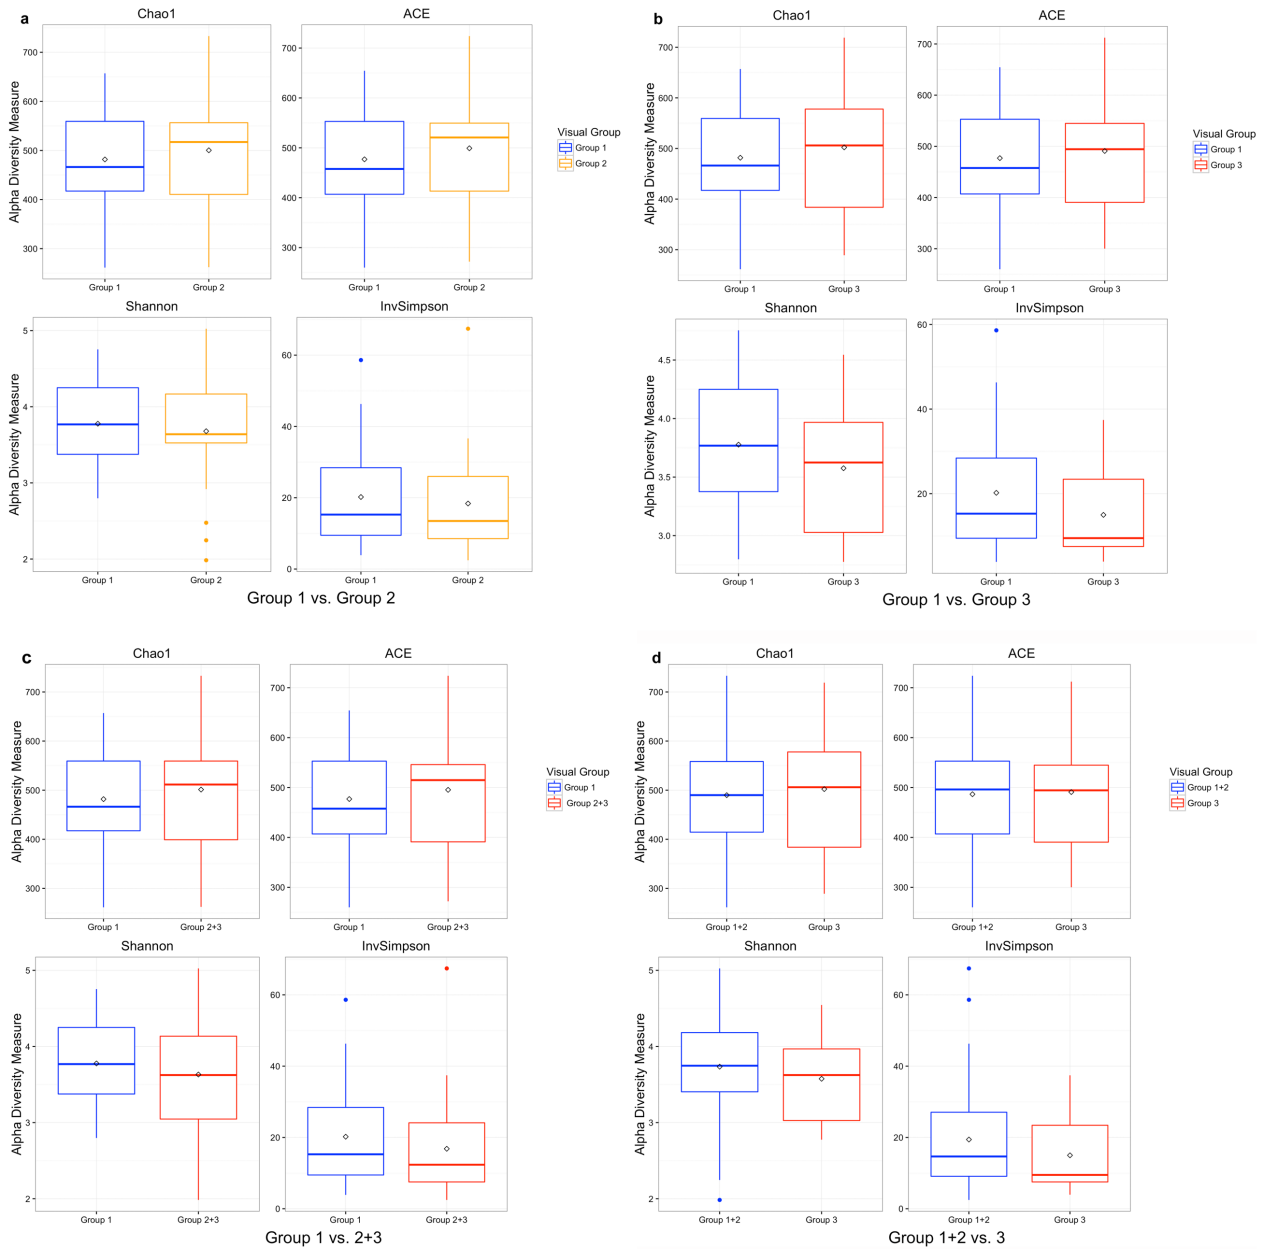

**TableS1. Association between alpha diversity and intestinal <sup>18</sup>F-FDG uptake**

|             | groups  | Chao1     |         | ACE       |         | Shannon   |         | InvSimpson |         |
|-------------|---------|-----------|---------|-----------|---------|-----------|---------|------------|---------|
|             |         | statistic | p.value | statistic | p.value | statistic | p.value | statistic  | p.value |
| t-test      | V_1vs2  | -0.57     | 0.57    | -0.68     | 0.50    | 0.47      | 0.64    | 0.41       | 0.68    |
|             | V_1vs3  | -0.53     | 0.60    | -0.37     | 0.72    | 1.10      | 0.28    | 1.38       | 0.18    |
|             | V_2vs3  | -0.04     | 0.97    | 0.20      | 0.84    | 0.45      | 0.65    | 0.78       | 0.44    |
|             | V_1vs23 | -0.69     | 0.49    | -0.65     | 0.52    | 0.90      | 0.37    | 0.96       | 0.34    |
|             | V_12vs3 | -0.33     | 0.74    | -0.12     | 0.91    | 0.91      | 0.37    | 1.31       | 0.20    |
| wilcox test | V_1vs2  | 233       | 0.56    | 234       | 0.58    | 267       | 0.89    | 286        | 0.58    |
|             | V_1vs3  | 198       | 0.58    | 209       | 0.78    | 261       | 0.33    | 278        | 0.16    |
|             | V_2vs3  | 175       | 0.89    | 186       | 0.64    | 190       | 0.56    | 187        | 0.62    |
|             | V_1vs23 | 431       | 0.49    | 443       | 0.60    | 528       | 0.52    | 564        | 0.25    |
|             | V_12vs3 | 373       | 0.79    | 395       | 0.96    | 451       | 0.36    | 465        | 0.26    |

**Fig. S2. Principal coordinate analysis (PCoA) plot with Bray-Curtis distance.** The PERMANOVA analysis showed that members of group 2 were significantly more dissimilar than them of group 1 ( $p=0.047$ , pseudo- $F=1.57$ ), although the comparison of the bacterial communities by PCoA plot could not easily distinguish the clear clustering between the two groups.

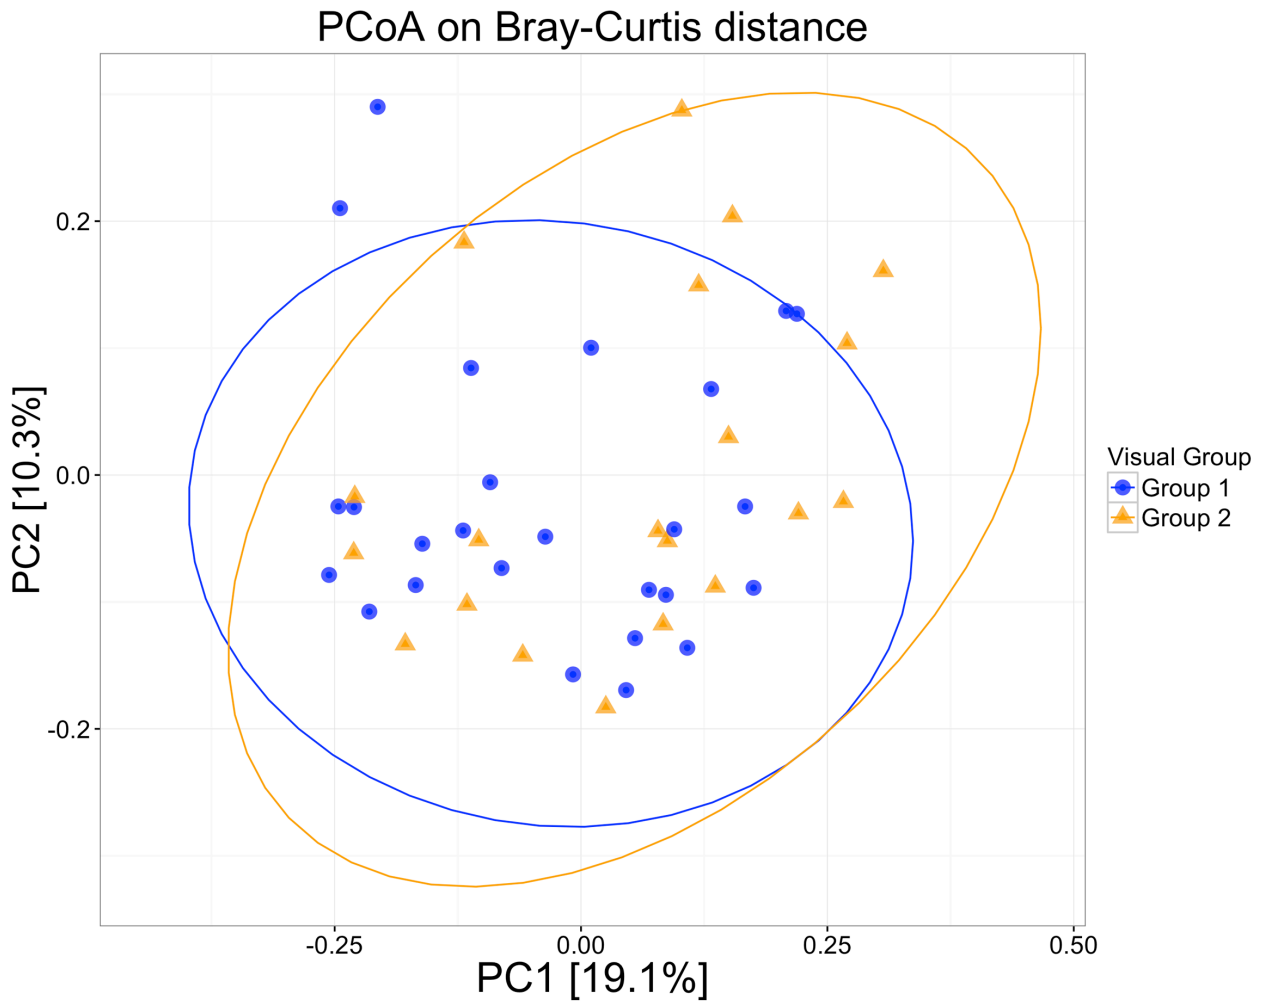

**Table S2-1. Associations of intestinal <sup>18</sup>F-FDG uptake with gut microbiota at the phylum level: Group 1 vs. 2**

| Phylum          | Relative Abundance in total samples (%) | baseMean | log2FoldChange (lfc) | lfcSE | stat  | <i>p-value</i> | <i>q-value</i> |
|-----------------|-----------------------------------------|----------|----------------------|-------|-------|----------------|----------------|
| Proteobacteria  | 4.04                                    | 541.83   | -0.77                | 0.43  | -1.79 | 7.43.E-02      | 5.20.E-01      |
| Bacteroidetes   | 34.40                                   | 9295.31  | 0.33                 | 0.30  | 1.08  | 2.82.E-01      | 6.59.E-01      |
| Verrucomicrobia | 0.40                                    | 11.47    | -0.69                | 0.60  | -1.15 | 2.51.E-01      | 6.59.E-01      |
| Actinobacteria  | 2.23                                    | 125.09   | -0.02                | 0.43  | -0.04 | 9.64.E-01      | 9.79.E-01      |
| Firmicutes      | 58.63                                   | 5737.63  | -0.07                | 0.20  | -0.36 | 7.20.E-01      | 9.79.E-01      |
| Fusobacteria    | 0.20                                    | 2.03     | -0.10                | 0.58  | -0.18 | 8.60.E-01      | 9.79.E-01      |
| Tenericutes     | 0.27                                    | 21.57    | 0.02                 | 0.61  | 0.03  | 9.79.E-01      | 9.79.E-01      |

**Table S2-2. Associations of intestinal <sup>18</sup>F-FDG uptake with gut microbiota at the phylum level: Group 1 vs. 3**

| Phylum              | Relative Abundance in total samples (%) | baseMean | log2FoldChange (lfc) | lfcSE | stat  | <i>p-value</i> | <i>q-value</i>   |
|---------------------|-----------------------------------------|----------|----------------------|-------|-------|----------------|------------------|
| <b>Fusobacteria</b> | 0.20                                    | 225.50   | 4.50                 | 1.40  | 3.21  | 1.33.E-03      | <b>9.32.E-03</b> |
| Firmicutes          | 58.63                                   | 6264.39  | -0.31                | 0.17  | -1.84 | 6.57.E-02      | 2.30.E-01        |
| Bacteroidetes       | 34.40                                   | 11282.56 | 0.30                 | 0.30  | 0.98  | 3.27.E-01      | 4.00.E-01        |
| Proteobacteria      | 4.04                                    | 773.70   | -0.73                | 0.57  | -1.28 | 1.99.E-01      | 4.00.E-01        |
| Tenericutes         | 0.27                                    | 18.31    | -1.15                | 1.21  | -0.95 | 3.43.E-01      | 4.00.E-01        |
| Verrucomicrobia     | 0.14                                    | 42.11    | 1.66                 | 1.41  | 1.18  | 2.39.E-01      | 4.00.E-01        |
| Actinobacteria      | 2.23                                    | 165.08   | 0.40                 | 0.58  | 0.70  | 4.87.E-01      | 4.87.E-01        |

**Table S2-3. Associations of intestinal <sup>18</sup>F-FDG uptake with gut microbiota at the phylum level: Group 2 vs. 3**

| Phylum          | Relative Abundance in total samples (%) | baseMean | log2FoldChange (lfc) | lfcSE | stat  | <i>p-value</i> | <i>q-value</i> |
|-----------------|-----------------------------------------|----------|----------------------|-------|-------|----------------|----------------|
| Proteobacteria  | 4.04                                    | 487.12   | 0.85                 | 0.51  | 1.67  | 0.09           | 0.38           |
| Firmicutes      | 58.63                                   | 7499.91  | -0.29                | 0.21  | -1.39 | 0.17           | 0.44           |
| Bacteroidetes   | 34.40                                   | 14258.32 | 0.10                 | 0.39  | 0.26  | 0.80           | 0.84           |
| Verrucomicrobia | 0.40                                    | 51.12    | -0.62                | 3.10  | -0.20 | 0.84           | 0.84           |
| Tenericutes     | 0.27                                    | 21.38    | -0.95                | 2.98  | -0.32 | 0.75           | 0.84           |
| Fusobacteria    | 0.20                                    | 309.91   | 1.81                 | 3.09  | 0.58  | 0.56           | 0.84           |
| Actinobacteria  | 2.23                                    | 209.61   | 0.43                 | 0.67  | 0.64  | 0.52           | 0.84           |

**Table S2-4. Associations of intestinal <sup>18</sup>F-FDG uptake with gut microbiota at the phylum level: Group 1 vs. 2+3**

| Phylum          | Relative Abundance in total samples (%) | baseMean | log2FoldChange (lfc) | lfcSE | stat  | <i>p-value</i> | <i>q-value</i> |
|-----------------|-----------------------------------------|----------|----------------------|-------|-------|----------------|----------------|
| Actinobacteria  | 2.23                                    | 144.88   | 0.19                 | 0.52  | 0.37  | 7.E-01         | 7.E-01         |
| Bacteroidetes   | 34.40                                   | 10447.66 | 0.30                 | 0.27  | 1.13  | 3.E-01         | 7.E-01         |
| Firmicutes      | 58.63                                   | 5860.97  | -0.15                | 0.16  | -0.98 | 3.E-01         | 7.E-01         |
| Fusobacteria    | 0.20                                    | 145.88   | 1.11                 | 0.96  | 1.16  | 2.E-01         | 7.E-01         |
| Proteobacteria  | 4.04                                    | 572.31   | -0.40                | 0.96  | -0.41 | 7.E-01         | 7.E-01         |
| Tenericutes     | 0.27                                    | 18.54    | -0.40                | 0.85  | -0.47 | 6.E-01         | 7.E-01         |
| Verrucomicrobia | 0.14                                    | 28.13    | 0.70                 | 1.01  | 0.69  | 5.E-01         | 7.E-01         |



**Table S2-5. Associations of intestinal 18F-FDG uptake with gut microbiota at the phylum level: Group 1+2 vs. 3**

| Phylum          | Relative<br>Abundance in<br>total samples (%) | baseMean | log2FoldChange<br>(lfc) | lfcSE | stat  | <i>p-value</i> | <i>q-value</i> |
|-----------------|-----------------------------------------------|----------|-------------------------|-------|-------|----------------|----------------|
| Fusobacteria    | 0.20                                          | 145.88   | 3.59                    | 1.50  | 2.40  | 1.65.E-02      | 1.16.E-01      |
| Firmicutes      | 58.63                                         | 5860.97  | -0.28                   | 0.17  | -1.63 | 1.02.E-01      | 2.77.E-01      |
| Verrucomicrobia | 0.14                                          | 28.13    | 2.07                    | 1.33  | 1.56  | 1.19.E-01      | 2.77.E-01      |
| Tenericutes     | 0.27                                          | 18.54    | -1.33                   | 1.03  | -1.29 | 1.99.E-01      | 3.48.E-01      |
| Actinobacteria  | 2.23                                          | 144.88   | 0.41                    | 0.58  | 0.70  | 4.86.E-01      | 6.65.E-01      |
| Bacteroidetes   | 34.40                                         | 10447.66 | 0.17                    | 0.30  | 0.57  | 5.70.E-01      | 6.65.E-01      |
| Proteobacteria  | 4.04                                          | 572.31   | -0.07                   | 1.50  | -0.05 | 9.63.E-01      | 9.63.E-01      |

**Table S3. Differing abundance of specific populations of gut microbiota between group 2 and group 3 for intestinal <sup>18</sup>F-FDG uptake at the genus level**

| Group   | Genus                         | Relative Abundance (%) <sup>a</sup> | Log2FoldChange (SE) | <i>p-value</i> | <i>q-value</i> |
|---------|-------------------------------|-------------------------------------|---------------------|----------------|----------------|
| 2 vs. 3 | Unclassified Clostridiales    | 4.10                                | -1.15 (0.38)        | 0.003          | 0.18           |
|         | <i>Holdemania</i>             | 0.06                                | -1.94 (0.87)        | 0.026          | 0.65           |
|         | Unclassified_Ruminococcaceae  | 13.56                               | -0.51 (0.27)        | 0.064          | 0.65           |
|         | Unclassified_Mogibacteriaceae | 0.30                                | -1.16 (0.65)        | 0.072          | 0.65           |
|         | Unclassified_S24-7            | 0.53                                | 2.28 (1.33)         | 0.086          | 0.65           |

<sup>a</sup>Relative abundance in total 63 samples

The top 5 ranked taxa were shown because there is no statistically significant difference between group 2 and group 3.
